# Supplementary material for: A highly reactive soybean oil-based superhydrophobic polyurethane film with long-lasting antifouling and abrasion resistance
Source: Royal Society of Chemistry journal article supplement (doi:10.1039/d4na00674g), 2024-01-01
Supplement: d4na00674g1.pdf [file d4na00674g1.pdf]

# Highly reactive soybean oil-based superhydrophobic polyurethane film with long-lasting antifouling and abrasion resistance

Junming Huang <sup>a,b</sup>, Genzheng Sha <sup>b,c</sup>, Minghui Cui <sup>b,c</sup>, Mengqiu Quan <sup>b,c</sup>, Yuqing Wang <sup>b,c</sup>, Yao

Lu <sup>a\*</sup>, Jin Zhu <sup>b,c</sup>, Jing Chen <sup>b,c\*</sup>

<sup>a</sup> *Department of Materials Science and Engineering, Shenyang University of Chemical Technology, Shenyang 110142, China*

<sup>b</sup> *Key Laboratory of Bio-based Polymeric Materials Technology and Application of Zhejiang Province, Laboratory of Polymers and Composites, Ningbo Institute of Material Technology and Engineering, Chinese Academy of Sciences, Zhejiang, Ningbo 315201, PR China*

<sup>c</sup> *University of Chinese Academy of Sciences, Beijing, 100039, China*

E-mail: [luyao915@syuct.edu.cn](mailto:luyao915@syuct.edu.cn) and [chenjing@nimte.ac.cn](mailto:chenjing@nimte.ac.cn)

**Table S1. Formulation of polyurethane preparation**

| <b>Sample</b>           | <b>Polyol (g)</b> | <b>IPDI (g)</b> | <b>OH-PDMS-OH (g)</b> | <b>OTMS/SiO<sub>2</sub> (g)</b> | <b>DMF (g)</b> | <b>DBTDL (g)</b> |
|-------------------------|-------------------|-----------------|-----------------------|---------------------------------|----------------|------------------|
| <b>PU-0</b>             | 1                 | 0.252           | 0                     | 0                               | 1.5            | 0.01             |
| <b>10%P/PU</b>          | 1                 | 0.436           | 0.1                   | 0                               | 1.5            | 0.01             |
| <b>20% P/PU</b>         | 1                 | 0.620           | 0.2                   | 0                               | 1.5            | 0.01             |
| <b>30% P/PU</b>         | 1                 | 0.804           | 0.3                   | 0                               | 1.5            | 0.01             |
| <b>10%O/Si-20% P/PU</b> | 1                 | 0.620           | 0.2                   | 0.182                           | 1.5            | 0.01             |
| <b>20%O/Si-20% P/PU</b> | 1                 | 0.620           | 0.2                   | 0.364                           | 1.5            | 0.01             |
| <b>30%O/Si-20% P/PU</b> | 1                 | 0.620           | 0.2                   | 0.546                           | 1.5            | 0.01             |

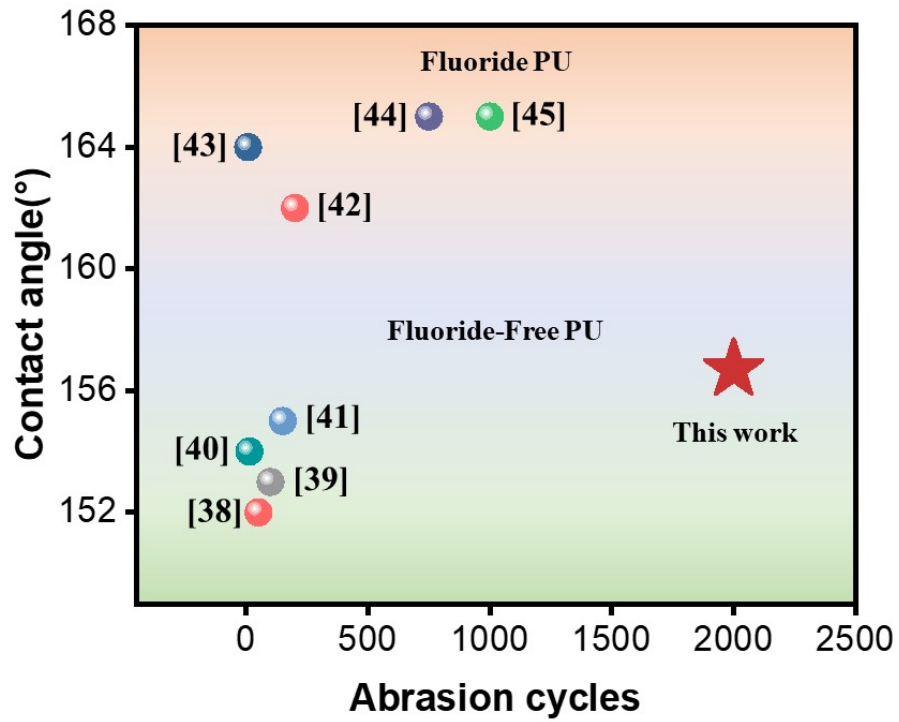

Figure S1. The sample maximum contact angle and superhydrophobic retention performance in sandpaper friction cycle tests, comparison of the article with existing literature reports.

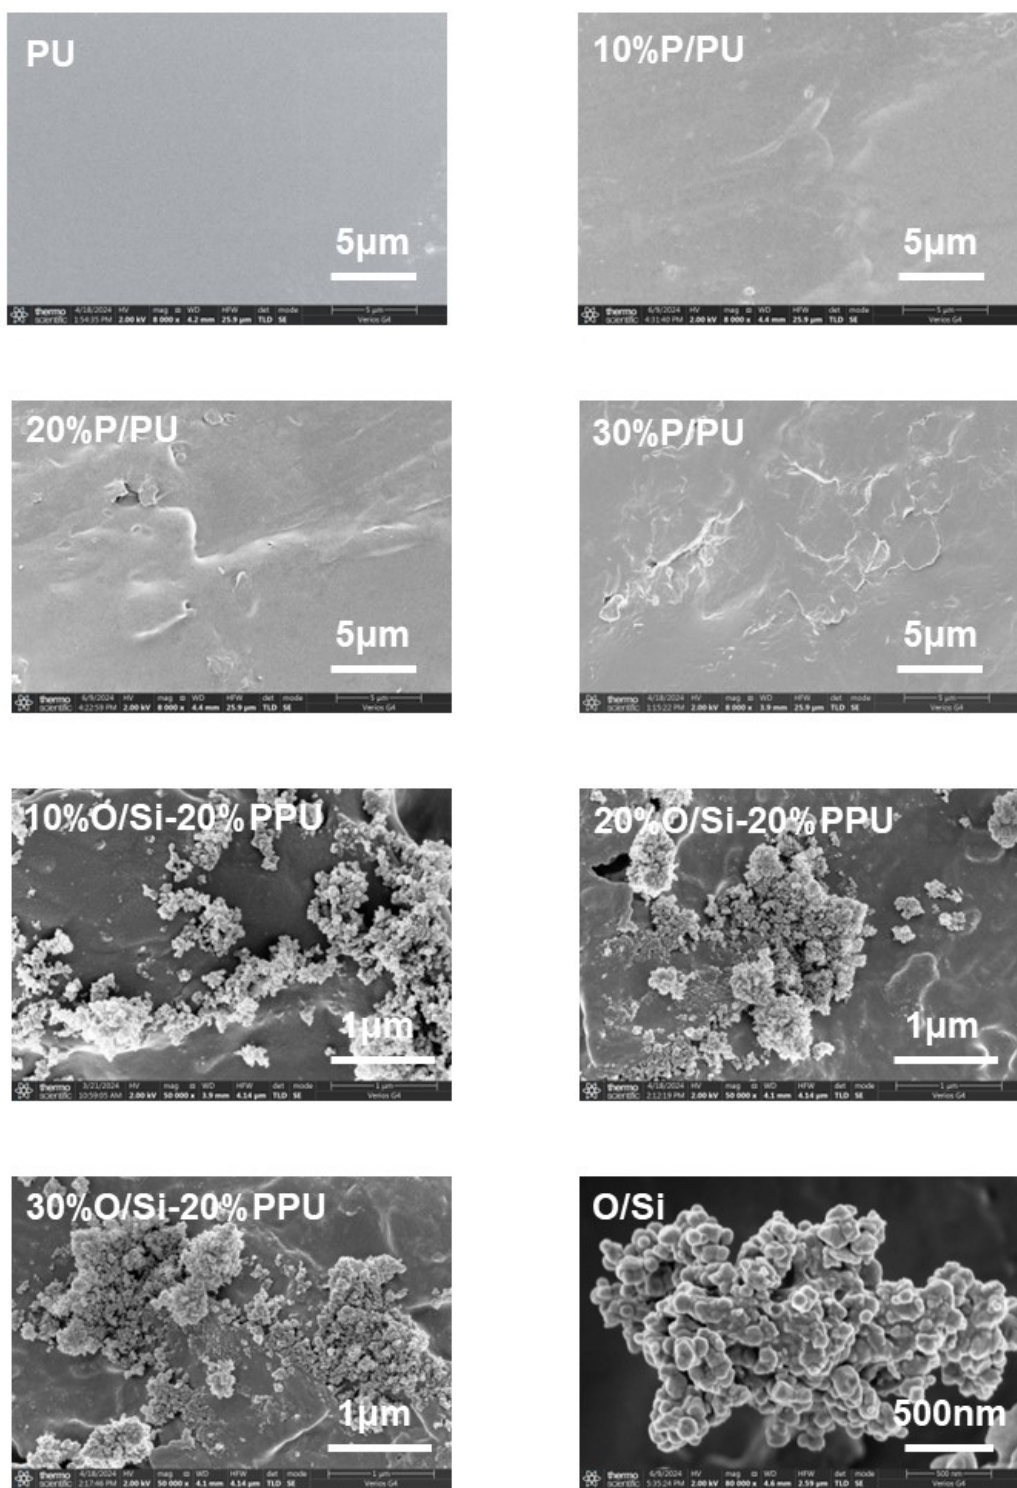

**Figure S2.** The results of the SEM tests for all experimental groups.

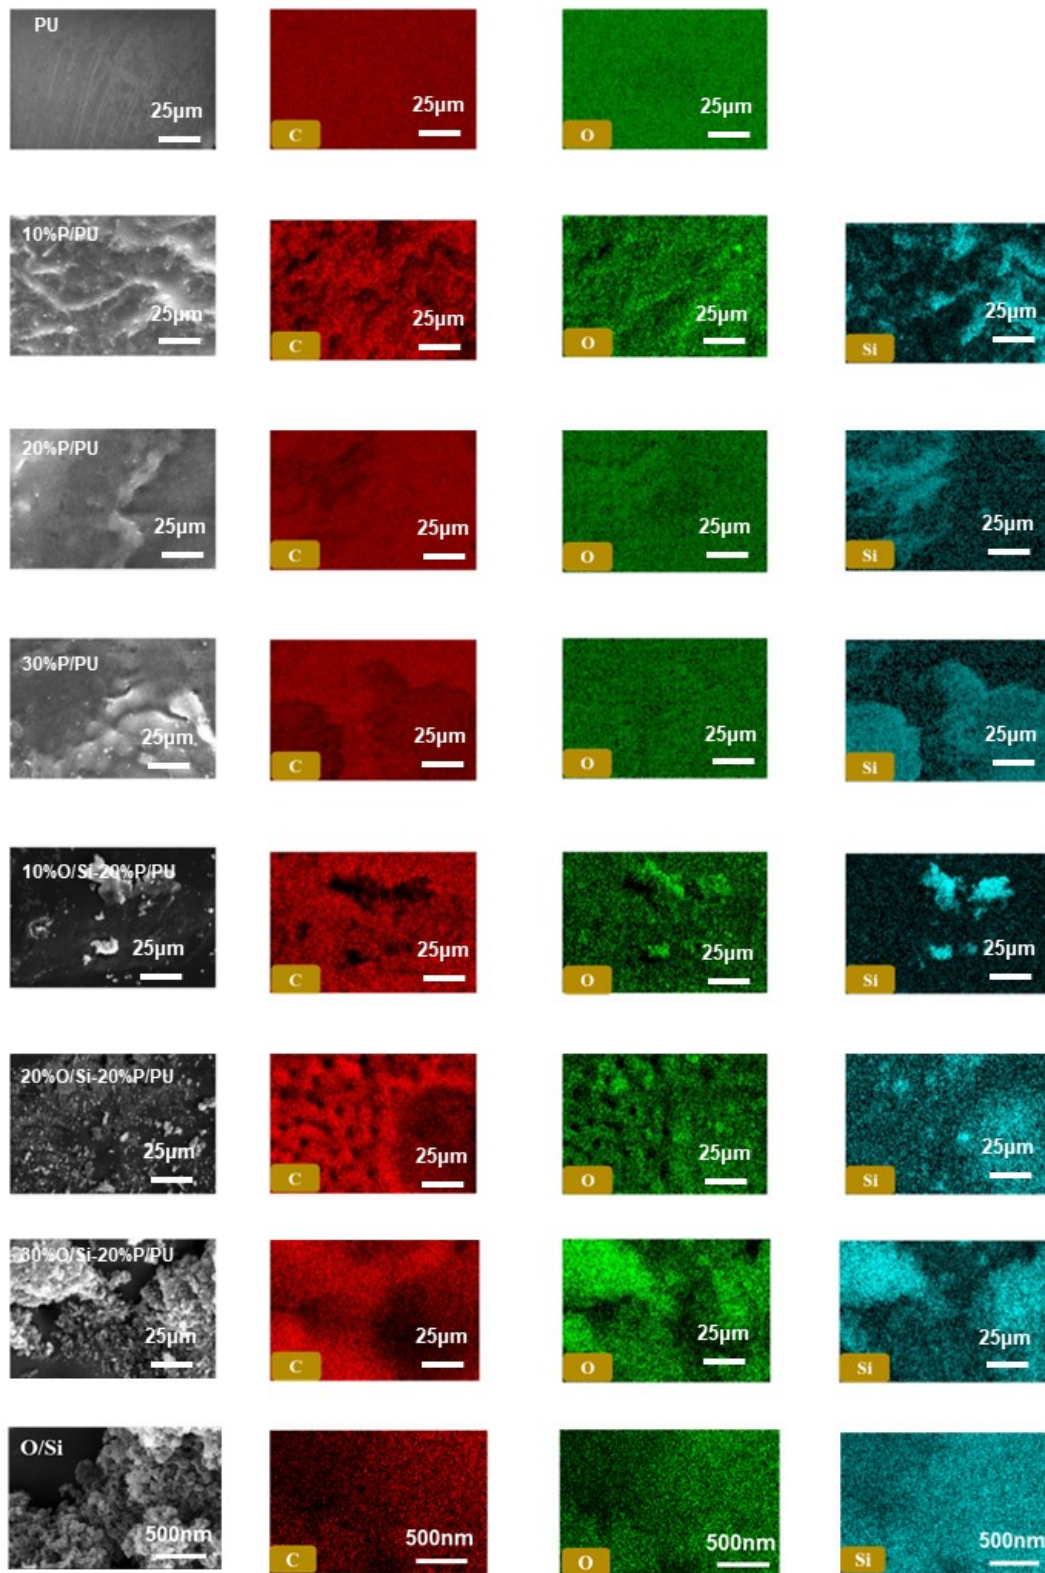

**Figure S3.** The results of the EDS tests for all experimental groups.

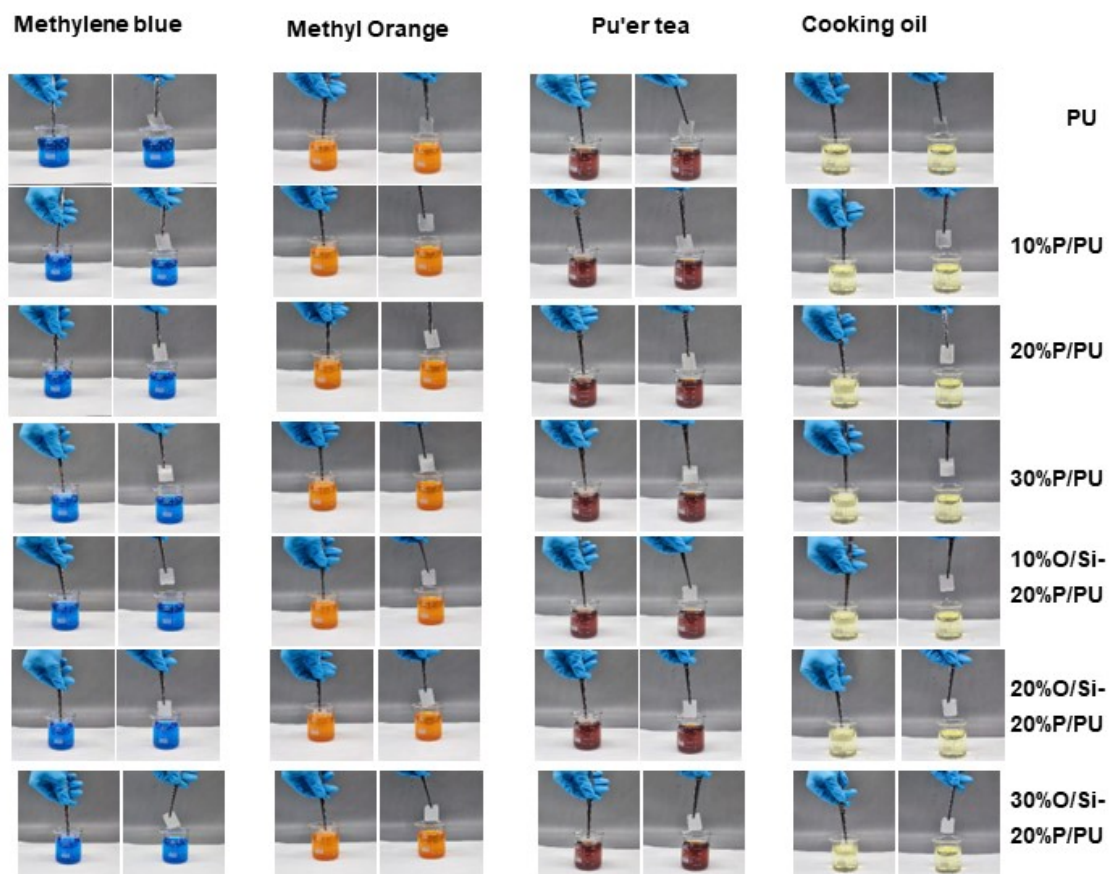

**Figure S4. The results of the antifouling tests for all experimental groups.**
